# Supplementary material for: A Circulating MicroRNA Profile in a Laser-Induced Mouse Model of Choroidal Neovascularization
Source: MDPI journal article supplement (doi:10.3390/ijms21082689), 2020-04-13
Supplement: s1 [file s1]

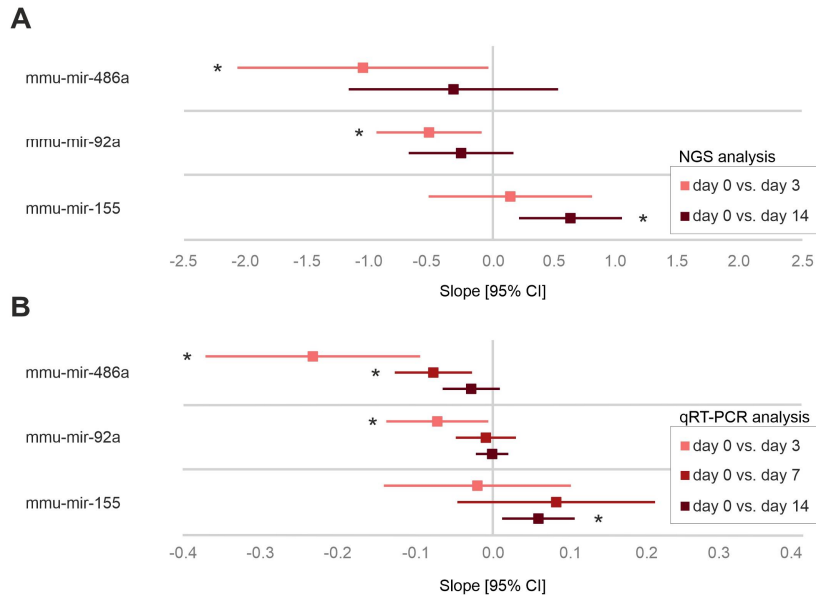

**Supplementary Figure 1.** CmiRNA regulation after laser-induced CNV in a discovery and a replication study. (a) The slope of three significantly dysregulated cmiRNAs in the discovery study (b) and replication study are shown. For the independent replication study using RT-qPCR, two additional batches of mice were treated with an argon laser, including 6 and 12 mice respectively. Shown are slopes with 95% confidence intervals for the three cmiRNAs for three different time points after laser treatment (days 3, 7 and 14) in comparison to day 0 as baseline control. All three cmiRNAs were differentially regulated at one or several time points of measurement. \* p-value < 0.05 (linear regression model).

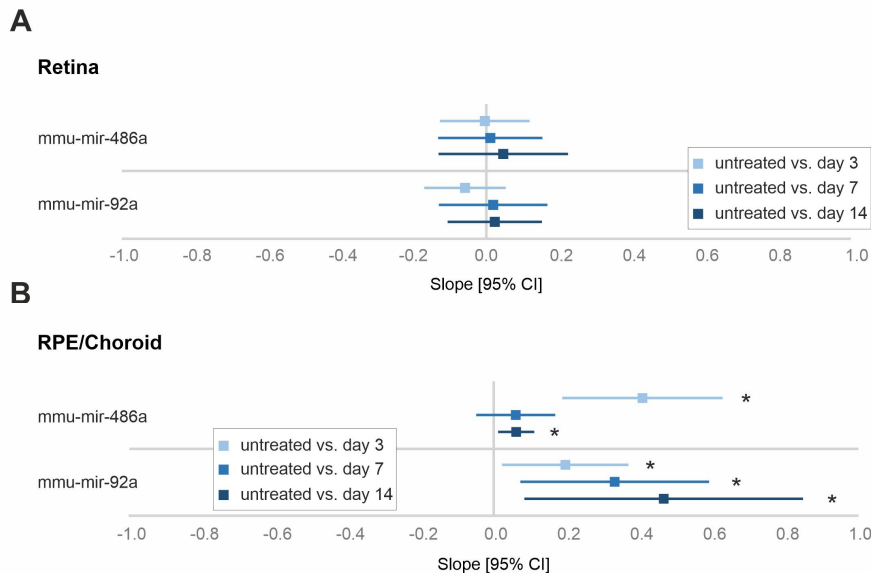

**Supplementary Figure 2.** MicroRNA regulation in ocular tissue after laser-induced CNV. (a) MiRNA expression levels of the two cmiRNAs dysregulated in blood samples, in retinal tissue and (b) RPE/choroidal tissue. Given are slopes with 95% confidence intervals which represent changes in expression of the respective miRNA expression in comparison to untreated control mice. \* Q-value < 0.05 (linear regression model, FDR corrected).
